# Supplementary material for: Heterolytic carbon–iodine bond cleavage by a palladium(i) metalloradical
Source: Royal Society of Chemistry journal article supplement (doi:10.1039/d2dt02152h), 2022-01-01
Supplement: d2dt02152h1.pdf [file d2dt02152h1.pdf]

Supporting information for:

**Heterolytic carbon–iodine bond cleavage by a palladium(I) metalloradical**

**Table of contents**

|                                                                                                                                                      |    |
|------------------------------------------------------------------------------------------------------------------------------------------------------|----|
| 1. General experimental methods .....                                                                                                                | 2  |
| 2. Reactions of $[\text{Pd}(\text{PtBu}_3)_2][\text{PF}_6]$ <b>1</b> .....                                                                           | 2  |
| 2.1. General procedure .....                                                                                                                         | 2  |
| 2.2. Phenyl iodide .....                                                                                                                             | 3  |
| 2.2.1. 1.1 equivalents monitored by NMR spectroscopy .....                                                                                           | 3  |
| 2.2.2. 1.5 equivalents monitored by NMR spectroscopy .....                                                                                           | 4  |
| 2.2.3. 1.5 equivalents in presence of excess phosphine monitored by NMR spectroscopy .....                                                           | 5  |
| 2.2.4. 1.5 equivalents monitored by UV/vis spectroscopy .....                                                                                        | 6  |
| 2.3. 2-methoxyphenyl iodide .....                                                                                                                    | 7  |
| 2.4. 2,6-dimethoxyphenyl iodide .....                                                                                                                | 8  |
| 2.5. Adamantyl iodide .....                                                                                                                          | 8  |
| 2.6. <i>tert</i> -Butyl iodide .....                                                                                                                 | 9  |
| 2.7. Potassium iodide / 18-crown-6 .....                                                                                                             | 9  |
| 3. Control reactions with tri- <i>tert</i> -butylphosphine .....                                                                                     | 10 |
| 3.1. General procedure .....                                                                                                                         | 10 |
| 3.2. Phenyl iodide .....                                                                                                                             | 10 |
| 3.3. Adamantyl iodide .....                                                                                                                          | 11 |
| 3.4. <i>tert</i> -Butyl iodide .....                                                                                                                 | 11 |
| 3.5. Iodine .....                                                                                                                                    | 12 |
| 3.6. Preparation of $[\text{PtBu}_3\text{H}][\text{PF}_6]$ .....                                                                                     | 12 |
| 4. Isolation, characterisation, and stability of $[\text{Pd}(\text{PtBu}_3)_2(2-(\text{MeO})\text{C}_6\text{H}_4)][\text{PF}_6]$ <b>4b</b> .....     | 14 |
| 4.1. Preparation of <b>4b</b> .....                                                                                                                  | 14 |
| 4.2. Stability of <b>4b</b> .....                                                                                                                    | 16 |
| 4.3. Stability of <b>4b</b> in the presence of excess $\text{PtBu}_3$ .....                                                                          | 17 |
| 5. Isolation, characterisation, and stability of $[\text{Pd}(\text{PtBu}_3)_2(2,6-(\text{MeO})_2\text{C}_6\text{H}_3)][\text{PF}_6]$ <b>4c</b> ..... | 18 |
| 5.1. Preparation of <b>4c</b> .....                                                                                                                  | 18 |
| 5.2. Stability of <b>4c</b> .....                                                                                                                    | 20 |
| 6. Mechanistic sketch .....                                                                                                                          | 20 |
| 7. References .....                                                                                                                                  | 21 |

## 1. General experimental methods

All manipulations were performed under an atmosphere of argon using Schlenk and glove box techniques unless otherwise stated. Glassware was oven dried at 150 °C overnight and flame-dried under vacuum prior to use. Molecular sieves were activated by heating at 300 °C *in vacuo* overnight. 1,2-Difluorobenzene (DFB) was stirred over neutral aluminium oxide, filtered, dried over CaH<sub>2</sub>, vacuum distilled, freeze-pump-thaw degassed, and then stored over activated 3 Å molecular sieves.<sup>1</sup> Commercial anhydrous CH<sub>2</sub>Cl<sub>2</sub>, pentane, and hexane were freeze-pump-thaw degassed and stored over activated 3 Å molecular sieves. Phenyl iodide, 2-methoxyphenyl iodide and *tert*-butyl iodide were freeze-pump-thaw degassed and stored over activated 3 Å molecular sieves. [Pd(PtBu<sub>3</sub>)<sub>2</sub>][PF<sub>6</sub>]**1**<sup>2</sup> and [Pd(PtBu<sub>3</sub>)(μ-I)]<sub>2</sub>**2**<sup>3</sup> were prepared using literature procedures. All other reagents are commercial products and were used as received. NMR spectra were recorded on Bruker spectrometers under argon at 298 K unless otherwise stated. Chemical shifts are quoted in ppm and coupling constants in Hz. Coupling constants for virtual triplets are reported as the separation between the first and third lines.<sup>4</sup> NMR spectra in DFB were recorded using an internal capillary of C<sub>6</sub>D<sub>6</sub>.<sup>1</sup> <sup>31</sup>P NMR spectra are referenced to a solution of O=P(OMe)<sub>3</sub> in C<sub>6</sub>D<sub>6</sub> (0.025 mol·L<sup>-1</sup>, δ 3.80 relative to 85% H<sub>3</sub>PO<sub>4</sub>). UV-vis spectra were recorded on an Agilent Cary 3500 UV-vis Spectrometer Compact Peltier System. HR ESI-MS were recorded on a Bruker MaXis mass spectrometer.

## 2. Reactions of [Pd(PtBu<sub>3</sub>)<sub>2</sub>][PF<sub>6</sub>]**1**

### 2.1. General procedure

To a solution of **1** (6.6 mg, 10 μmol) in DFB (0.5 mL) within a J. Young valve NMR tube was added the substrate at RT. The resulting solution was monitored using <sup>1</sup>H and <sup>31</sup>P NMR spectroscopy, with constant mixing when not in the spectrometer. The concentration of **1** can be monitored by a broad paramagnetically shifted <sup>1</sup>H resonance at δ 19 in DFB.

**Table S1.** <sup>31</sup>P NMR data in DFB solution (excluding anion).

| Compound                                                                                                                  | δ <sub>31P</sub> | Comment                               |
|---------------------------------------------------------------------------------------------------------------------------|------------------|---------------------------------------|
| [Pd(PtBu <sub>3</sub> ) <sub>2</sub> ]                                                                                    | 84.8             | Isolated (commercial)                 |
| [Pd(PtBu <sub>3</sub> ) <sub>2</sub> ][PF <sub>6</sub> ] <b>1</b>                                                         | No signal        | Isolated (literature)                 |
| [Pd(PtBu <sub>3</sub> )(μ-I)] <sub>2</sub> <b>2</b>                                                                       | 103.5            | Isolated (literature)                 |
| [Pd(PtBu <sub>3</sub> ) <sub>2</sub> (Ph)][PF <sub>6</sub> ] <b>4a</b>                                                    | 61.0             | Observed <i>in situ</i> (new)         |
| [Pd(PtBu <sub>3</sub> ) <sub>2</sub> (2-(MeO)C <sub>6</sub> H <sub>4</sub> )][PF <sub>6</sub> ] <b>4b</b>                 | 62.0             | Isolated (new)                        |
| [Pd(PtBu <sub>3</sub> ) <sub>2</sub> (2,6-(MeO) <sub>2</sub> C <sub>6</sub> H <sub>3</sub> )][PF <sub>6</sub> ] <b>4c</b> | 65.3             | Isolated (new)                        |
| PtBu <sub>3</sub>                                                                                                         | 62.9             | Isolated (commercial)                 |
| [PtBu <sub>3</sub> H][PF <sub>6</sub> ]                                                                                   | 56.0             | Isolated (literature)                 |
| [PtBu <sub>3</sub> I]                                                                                                     | 114.7            | Generated <i>in situ</i> (literature) |
| [PtBu <sub>3</sub> Ph][PF <sub>6</sub> ] <b>3a</b>                                                                        | 49.7             | Isolated (literature)                 |
| [PtBu <sub>3</sub> (2-(MeO)C <sub>6</sub> H <sub>4</sub> )][PF <sub>6</sub> ] <b>3b</b>                                   | 64.2             | Generated <i>in situ</i> (literature) |
| [PtBu <sub>3</sub> Ad][PF <sub>6</sub> ] <b>3d</b>                                                                        | 49.9             | Generated <i>in situ</i> (literature) |

## 2.2. Phenyl iodide

### 2.2.1. 1.1 equivalents monitored by NMR spectroscopy

Following the general procedure using PhI (1.2  $\mu$ L, 11  $\mu$ mol). Complete consumption of **1** was observed by  $^1\text{H}$  NMR spectroscopy within 24 h at RT. At this point, formation of  $[\text{Pd}(\text{PtBu}_3)(\mu\text{-I})]_2$  **2** and  $[\text{PtBu}_3\text{Ph}]^+$  **3a** in a 1:2 mixture (>97% selectivity) was observed by  $^{31}\text{P}$  NMR spectroscopy. Phenyl phosphonium **3a** was subsequently isolated as a white solid by successive recrystallisation from DFB/hexane, pyridine/hexane and finally  $\text{CH}_2\text{Cl}_2$ /hexane at RT. Yield: 1.3 mg (3.1  $\mu$ mol, 30%/Pd). Spectroscopic data is consistent with that reported for the corresponding triflate salt and the assignment is supported by determination of the solid-state structure and ESI-MS.<sup>5</sup>

$^{31}\text{P}\{^1\text{H}\}$  NMR (162 MHz, DFB/ $\text{C}_6\text{D}_6$ ):  $\delta$  49.7 (s, 1P,  $\text{PtBu}_3\text{Ph}$ ), -142.5 (sept,  $^1J_{\text{PF}} = 710$ , 1P,  $\text{PF}_6$ ).

HR ESI-MS (positive ion, 4 kV): 279.2238 ( $[\text{M}]^+$ , calcd 279.2236)  $m/z$ .

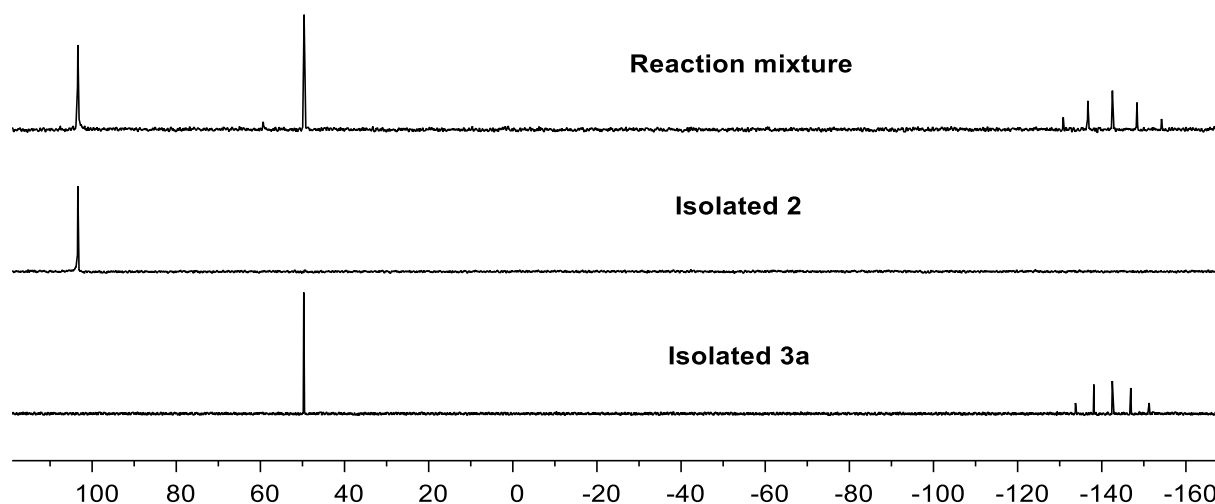

**Figure S1.**  $^{31}\text{P}\{^1\text{H}\}$  NMR spectra of the products resulting from addition of 1.1 equivalents of PhI to **1** (DFB/ $\text{C}_6\text{D}_6$ , 162 MHz).

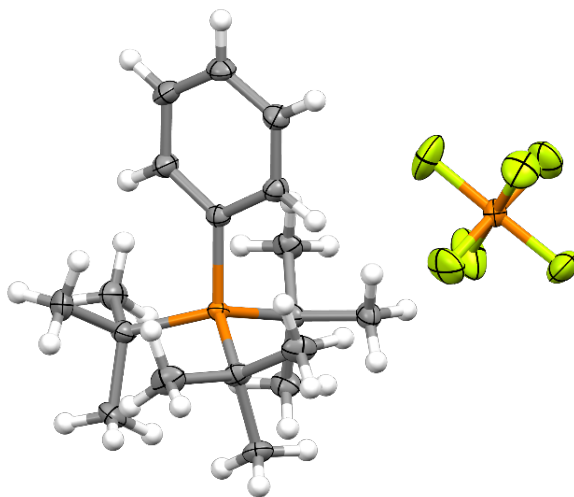

**Figure S2.** Solid-state structure of **3a**. Thermal ellipsoids at 50% probability.

### 2.2.2. 1.5 equivalents monitored by NMR spectroscopy

Following the general procedure using PhI (1.7  $\mu$ L, 15  $\mu$ mol). Complete consumption of **1** was observed by  $^1\text{H}$  NMR spectroscopy within 3 h at RT. At this point, a 1:3:1 mixture of  $[\text{Pd}(\text{P}t\text{Bu}_3)(\mu\text{-I})]_2$  **2**,  $[\text{P}t\text{Bu}_3\text{Ph}]^+$  **3a**, and a species assigned to  $[\text{Pd}(\text{P}t\text{Bu}_3)_2(\text{Ph})]^+$  **4a** was observed by  $^{31}\text{P}$  NMR spectroscopy, along with a trace amount of  $[\text{P}t\text{Bu}_3\text{H}]^+$ . After a further 2 h, decomposition of **4a** into **3a** gave a 1:4 mixture of **2** and **3a**, with trace amounts of  $[\text{P}t\text{Bu}_3\text{H}]^+$ .

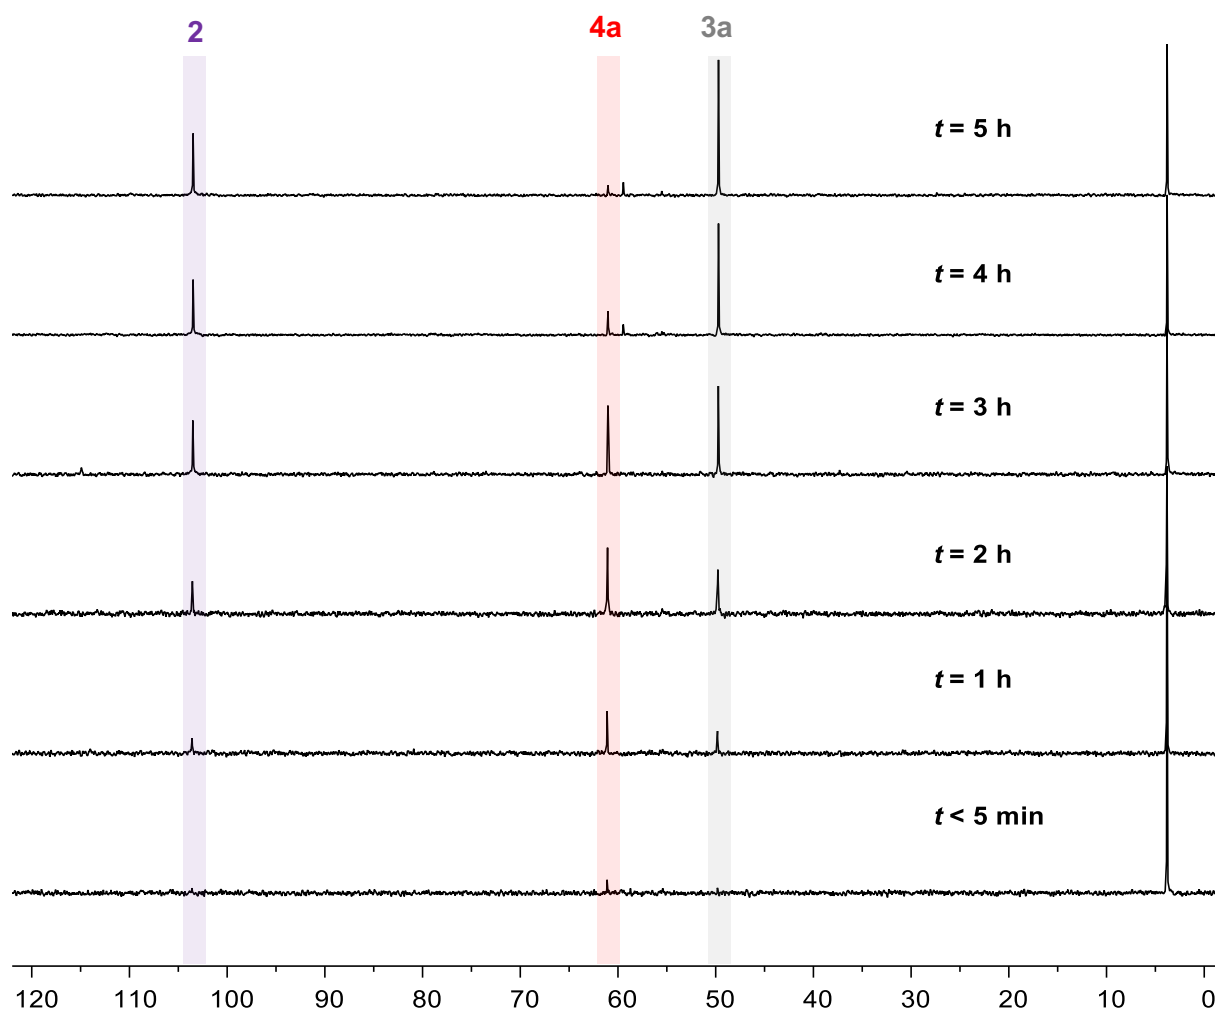

**Figure S3.**  $^{31}\text{P}\{^1\text{H}\}$  NMR spectra collected following addition of 1.5 equivalents of PhI to **1** (DFB/ $\text{C}_6\text{D}_6$ , 162 MHz;  $\text{O}=\text{P}(\text{OMe})_3$  internal reference at  $\delta$  3.8).

### 2.2.3. 1.5 equivalents in presence of excess phosphine monitored by NMR spectroscopy

Following the general procedure using PhI (1.7  $\mu$ L, 15  $\mu$ mol) and  $\text{PtBu}_3$  (70  $\mu$ L of a 0.72 M solution in hexane, 50  $\mu$ mol). Complete consumption of **1** was observed by  $^1\text{H}$  NMR spectroscopy within 6 h at RT. At this point, a 1:3:3 mixture of  $[\text{Pd}(\text{PtBu}_3)(\mu\text{-I})_2]$  **2**,  $[\text{PtBu}_3\text{Ph}]^+$  **3a**, and  $[\text{Pd}(\text{PtBu}_3)_2(\text{Ph})]^+$  **4a** was observed by  $^{31}\text{P}$  NMR spectroscopy, with the signal for  $\text{PtBu}_3$  shifted to higher frequency and broadened. After a further 3 h, decomposition of **4a** into **3a** gave a 1:5 mixture of **2** and **3a**, with trace amounts of  $[\text{PtBu}_3\text{H}]^+$ .

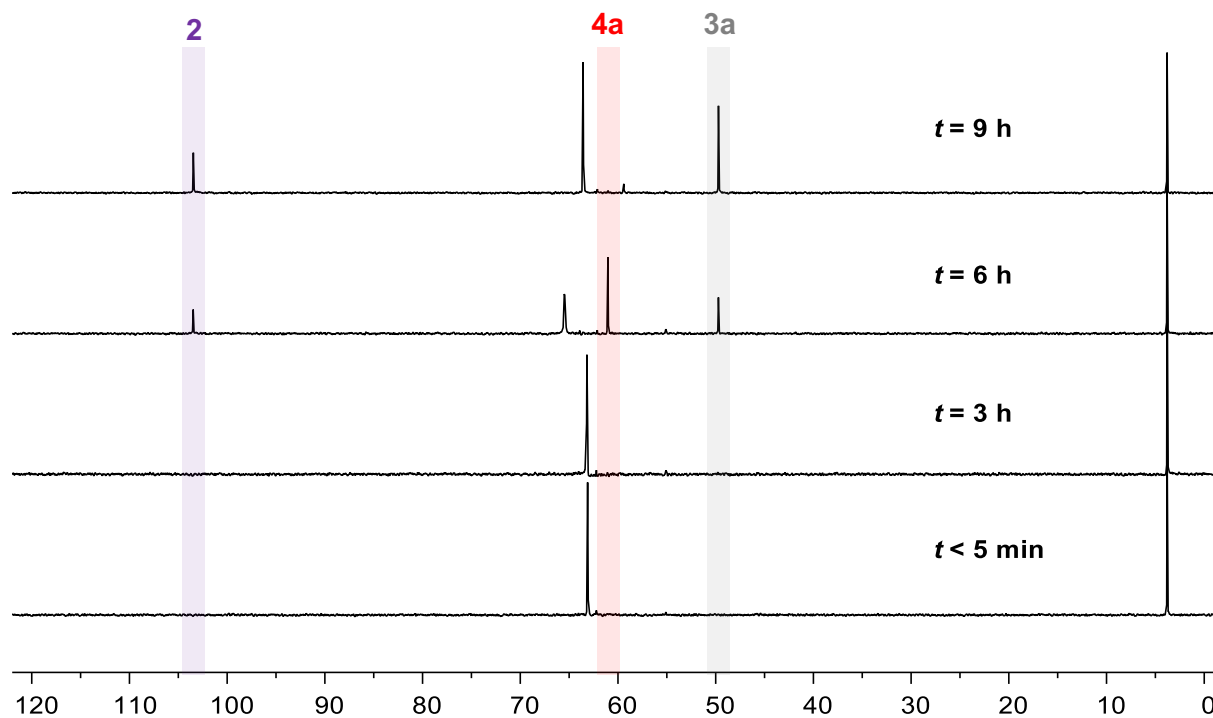

**Figure S4.**  $^{31}\text{P}\{^1\text{H}\}$  NMR spectra collected following addition of 1.5 equivalents of PhI to **1** in the presence of excess  $\text{PtBu}_3$  (DFB/ $\text{C}_6\text{D}_6$ , 162 MHz;  $\text{O}=\text{P}(\text{OMe})_3$  internal reference at  $\delta$  3.8).

#### 2.2.4. 1.5 equivalents monitored by UV/vis spectroscopy

To a 6 mL glass screw top vial charged with **1** (26.2 mg, 40  $\mu\text{mol}$ ) and a magnetic stirrer bar in an inert atmosphere glove box was added a solution of PhI (2 mL, 0.03 mol L<sup>-1</sup>, 60  $\mu\text{mol}$ ) in DFB. The vial was sealed and the solution stirred at RT for 6 h. The reaction was monitored every 30 minutes by taking 40  $\mu\text{L}$  aliquots, which were diluted to 3 mL and analysed immediately by UV/vis spectroscopy. Concentrations of **1** and **2** were determined by least squares fitting of spectra recorded of isolated samples between 475 and 800 nm, whilst the concentration of **4a** was estimated using the background corrected absorption at 305 nm (maximum from residue, cf. **4b/4c**) and  $\epsilon = 7000 \text{ L}^{-1} \text{ mol}^{-1} \text{ cm}^{-1}$ . After 6 h, 0.5 mL of the solution was transferred into a J. Young valve NMR tube and analysed by <sup>31</sup>P NMR spectroscopy, which indicated formation of a 1:3 mixture of **2** and **3a**, with trace amounts of [PtBu<sub>3</sub>H]<sup>+</sup>.

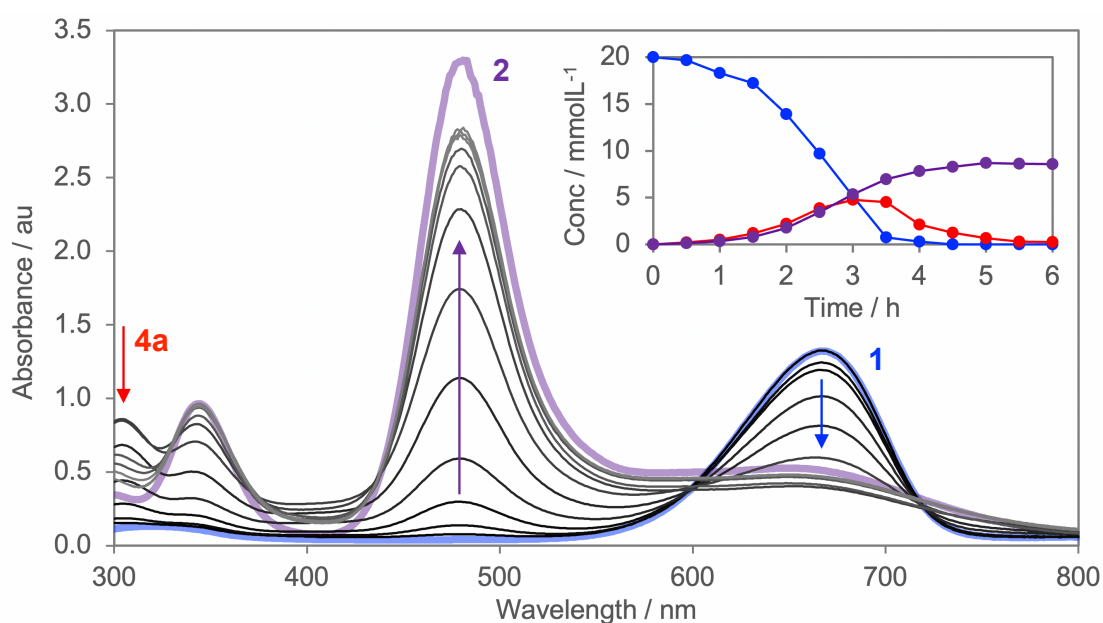

**Figure S5.** UV/vis spectra collected following addition of 1.5 equivalents of PhI to **1**, reference spectra of **1** (blue) and **2** (purple), and time course data for **1** (blue), **2** (purple) and **4a** (red).

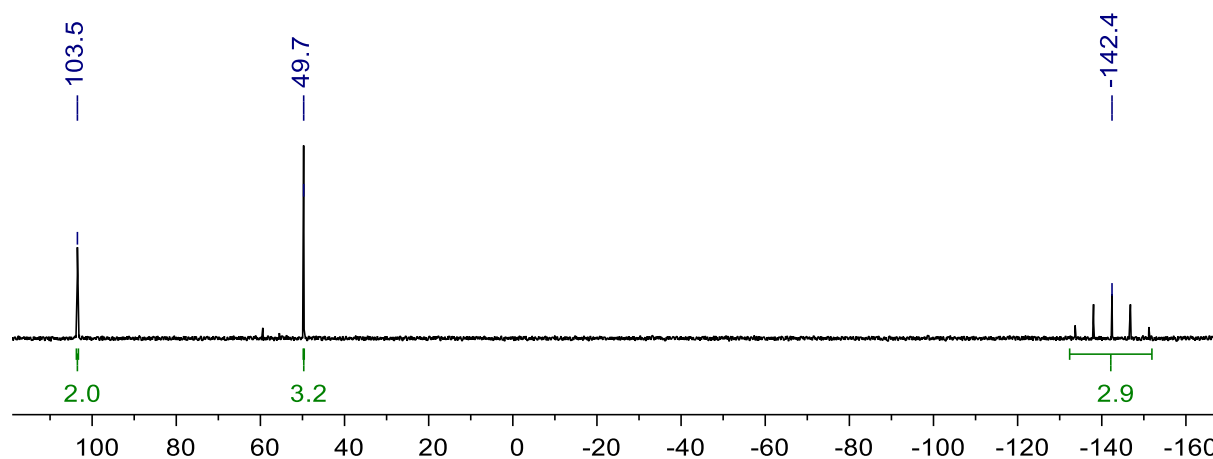

**Figure S6.** <sup>31</sup>P{<sup>1</sup>H} NMR spectra of the products resulting from addition of 1.5 equivalents of PhI to **1** (DFB/C<sub>6</sub>D<sub>6</sub>, 162 MHz).

### 2.3. 2-methoxyphenyl iodide

Following the general procedure using 2-(MeO)C<sub>6</sub>H<sub>4</sub>I (2.0 μL, 15 μmol). Complete consumption of **1** was observed by <sup>1</sup>H NMR spectroscopy within 24 h at RT. At this point, a 1:2:2 mixture of [Pd(PtBu<sub>3</sub>)(μ-I)]<sub>2</sub> **2**, [Pd(PtBu<sub>3</sub>)<sub>2</sub>(2-(MeO)C<sub>6</sub>H<sub>4</sub>)]<sup>+</sup> **4b**, and [PtBu<sub>3</sub>]<sup>+</sup> was observed by <sup>31</sup>P NMR spectroscopy, along with a trace amount of [PtBu<sub>3</sub>(2-(MeO)C<sub>6</sub>H<sub>4</sub>)]<sup>+</sup> **3b**. After a further 7 days, decomposition of **4b** into **3b** and [PtBu<sub>3</sub>H]<sup>+</sup> was observed. Spectroscopic data of **3b** is consistent with that reported for the corresponding [B{3,5-(CF<sub>3</sub>)<sub>2</sub>C<sub>6</sub>H<sub>3</sub>}<sub>4</sub>]<sup>-</sup> salt in this solvent and the assignment is supported by determination of the solid-state structure.<sup>6</sup>

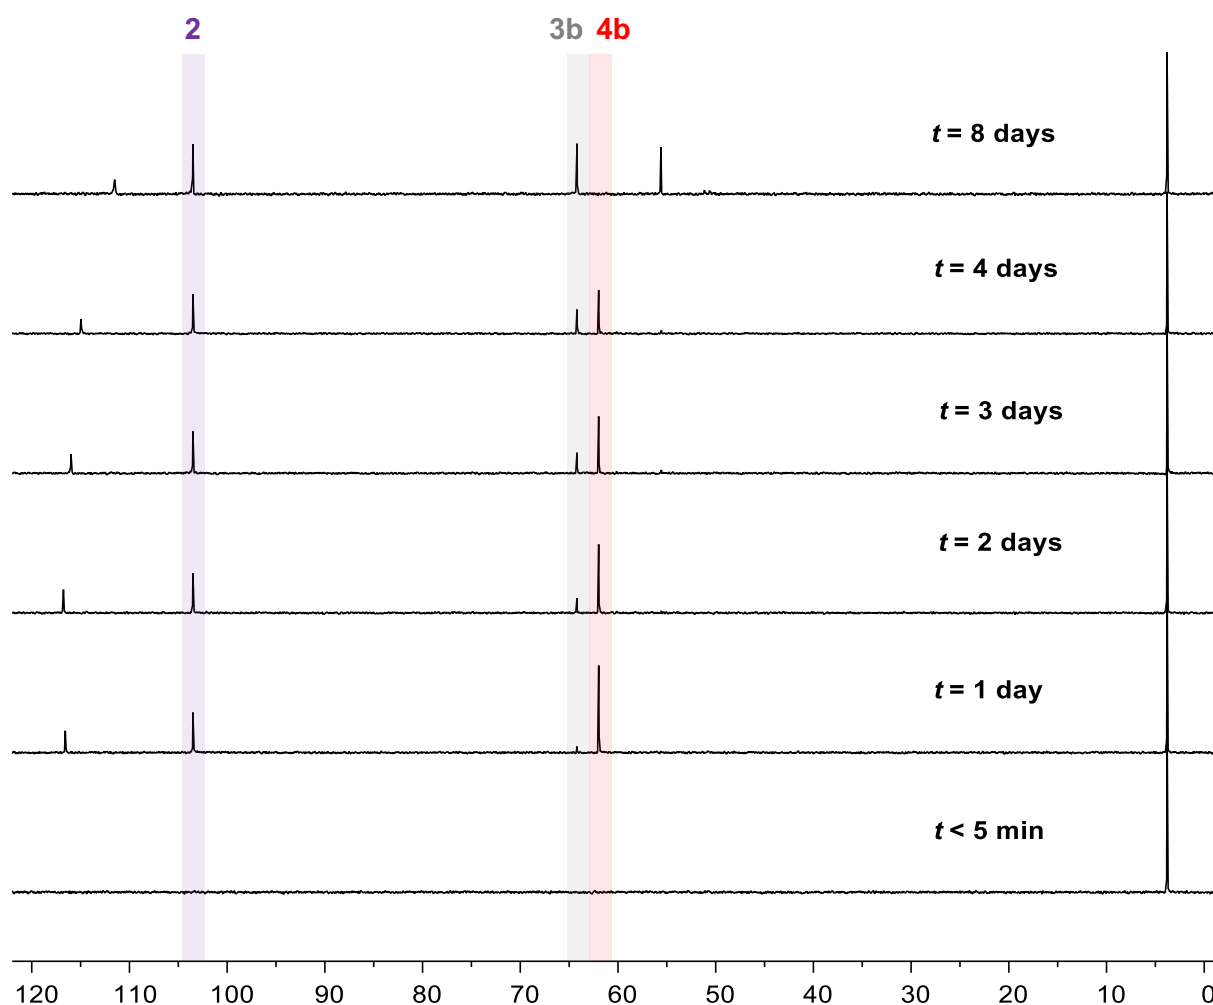

**Figure S7.** <sup>31</sup>P{<sup>1</sup>H} NMR spectra collected following addition of 1.5 equivalents of 2-(MeO)C<sub>6</sub>H<sub>4</sub>I to **1** (DFB/C<sub>6</sub>D<sub>6</sub>, 162 MHz; O=P(OMe)<sub>3</sub> internal reference at δ 3.8).

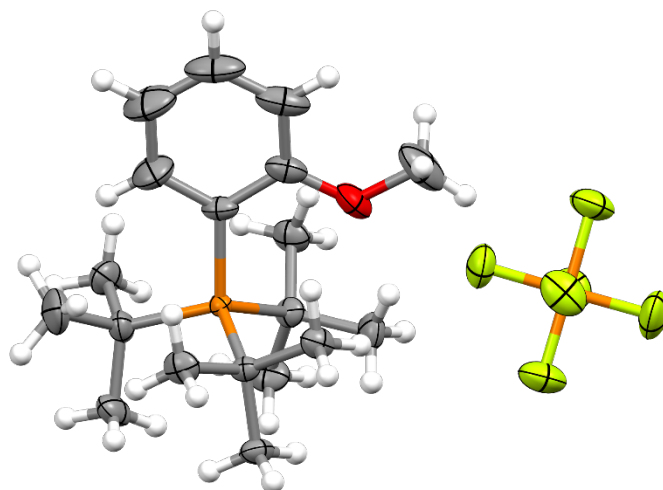

**Figure S8.** Solid-state structure of **3b**. Thermal ellipsoids at 50% probability.

#### 2.4. 2,6-dimethoxyphenyl iodide

Following the general procedure using 2,6-(MeO) $\text{C}_6\text{H}_3\text{I}$  (4.1 mg, 16  $\mu\text{mol}$ ). Complete consumption of **1** was observed by  $^1\text{H}$  NMR spectroscopy within 24 h at RT. At this point a 1:3:2 mixture of  $[\text{Pd}(\text{PtBu}_3)(\mu\text{-I})]_2$  **2**,  $[\text{Pd}(\text{PtBu}_3)_2(2,6\text{-(MeO)}_2\text{C}_6\text{H}_4)]^+$  **4c**, and  $[\text{PtBu}_3\text{I}]^+$  was observed by  $^{31}\text{P}$  NMR spectroscopy.

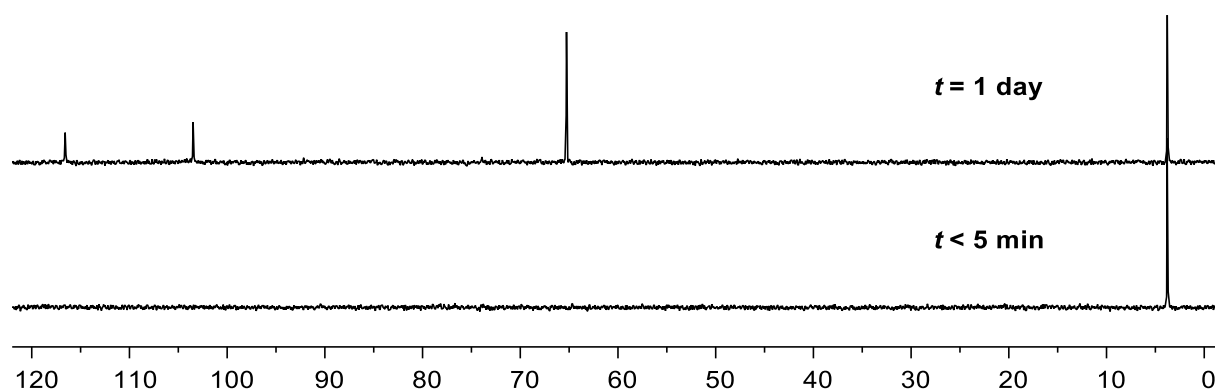

**Figure S9.**  $^{31}\text{P}\{^1\text{H}\}$  NMR spectra collected following addition of 1.5 equivalents of 2,6-(MeO) $\text{C}_6\text{H}_3\text{I}$  to **1** (DFB/ $\text{C}_6\text{D}_6$ , 162 MHz;  $\text{O}=\text{P}(\text{OMe})_3$  internal reference at  $\delta$  3.8).

#### 2.5. Adamantyl iodide

Following the general procedure using AdI (3.9 mg, 15  $\mu\text{mol}$ ). Complete consumption of **1** was observed by  $^1\text{H}$  NMR spectroscopy within 8 days at RT. At this point a mixture containing  $[\text{Pd}(\text{PtBu}_3)(\mu\text{-I})]_2$  **2** and  $[\text{PtBu}_3\text{Ad}]^+$  **3d** in a 1:2 ratio was observed by  $^{31}\text{P}$  NMR spectroscopy along with trace amounts of  $[\text{PtBu}_3\text{H}]^+$  and an unknown species at  $\delta$  77.3. Spectroscopic data of **3d** is consistent with that reported for the corresponding  $[\text{B}(\text{C}_6\text{F}_5)_3\text{F}]^-$  salt and the assignment is supported by ESI-MS (observed, 337.3025; calcd 337.3019  $m/z$ ).<sup>7</sup>

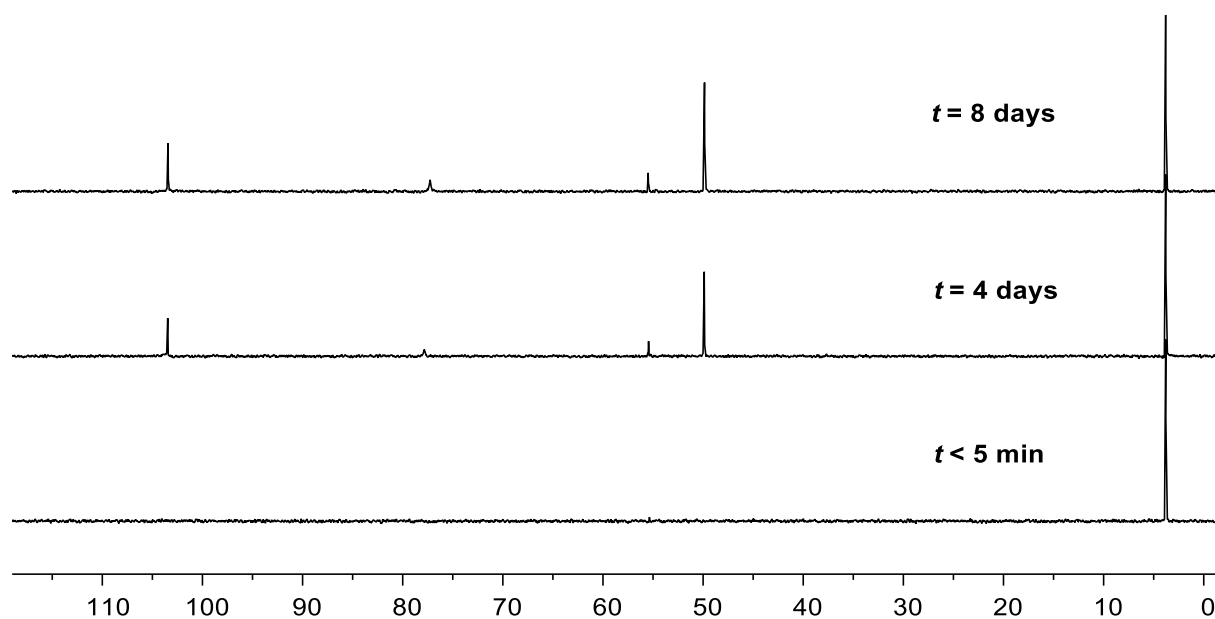

**Figure S10.**  $^{31}\text{P}\{^1\text{H}\}$  NMR spectra collected following addition of 1.5 equivalents of AdI to **1** (DFB/ $\text{C}_6\text{D}_6$ , 162 MHz;  $\text{O}=\text{P}(\text{OMe})_3$  internal reference at  $\delta$  3.8).

## 2.6. *tert*-Butyl iodide

Following the general procedure using *t*Bul (1.7  $\mu\text{L}$ , 14  $\mu\text{mol}$ ). Complete consumption of **1** was observed by  $^1\text{H}$  NMR spectroscopy within 24 h at RT. At this point a 1:2 mixture of  $[\text{Pd}(\text{P}t\text{Bu}_3)(\mu\text{-I})]_2$  **2** and  $[\text{P}t\text{Bu}_3\text{H}]^+$  was observed by  $^{31}\text{P}$  NMR spectroscopy. Generation of 2-methylpropene was apparent from the  $^1\text{H}$  NMR spectrum, with resonances at  $\delta$  4.56 (2H) and 1.54 (6H).<sup>8</sup>

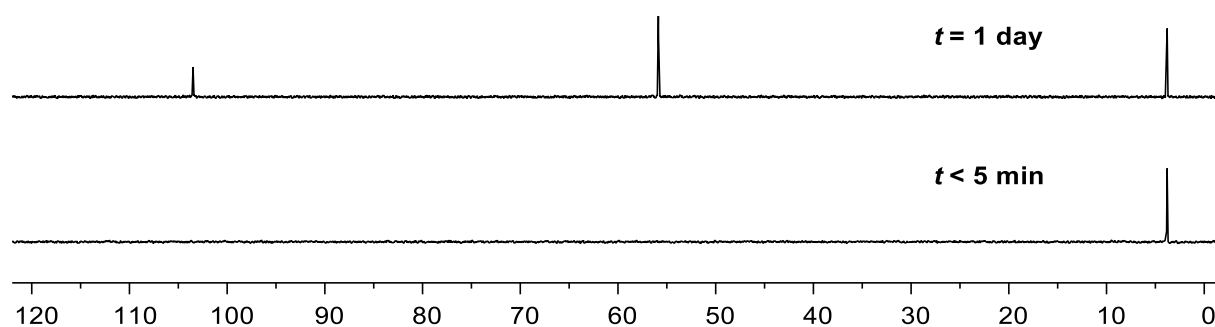

**Figure S11.**  $^{31}\text{P}\{^1\text{H}\}$  NMR spectra collected following addition of 1.4 equivalents of *t*Bul to **1** (DFB/ $\text{C}_6\text{D}_6$ , 162 MHz;  $\text{O}=\text{P}(\text{OMe})_3$  internal reference at  $\delta$  3.8).

## 2.7. Potassium iodide / 18-crown-6

Following the general procedure using KI (16.8 mg, 101  $\mu\text{mol}$ ) and 18-crown-6 (26.3 mg, 99.5  $\mu\text{mol}$ ). Complete consumption of **1** and conversion to  $[\text{Pd}(\text{P}t\text{Bu}_3)(\mu\text{-I})]_2$  **2** and  $\text{P}t\text{Bu}_3$  was observed within 5 min at RT.

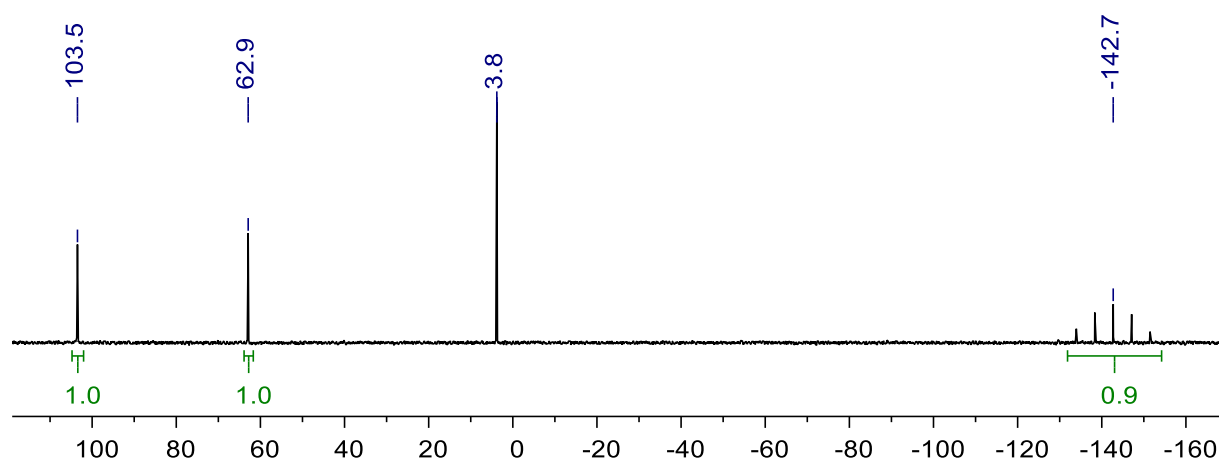

**Figure S12.**  $^{31}\text{P}\{^1\text{H}\}$  NMR spectra of the products resulting from addition of 10 equivalents of KI and 18-crown-6 to **1** (DFB/ $\text{C}_6\text{D}_6$ , 162 MHz,  $\text{O}=\text{P}(\text{OMe})_3$  internal reference at  $\delta$  3.8).

### 3. Control reactions with tri-*tert*-butylphosphine

#### 3.1. General procedure

To a solution of  $\text{PtBu}_3$  (10  $\mu\text{mol}$ ) in DFB (0.5 mL) within a J. Young valve NMR tube was added 10 equivalents of substrate at RT. The resulting solution was monitored using  $^1\text{H}$  and  $^{31}\text{P}$  NMR spectroscopy, with constant mixing when not in the spectrometer.

#### 3.2. Phenyl iodide

Following the general procedure using PhI (11.2  $\mu\text{L}$ , 100  $\mu\text{mol}$ ). No reaction was apparent after 24 h at RT, nor after subsequent heating at 50  $^\circ\text{C}$  for 24 h.

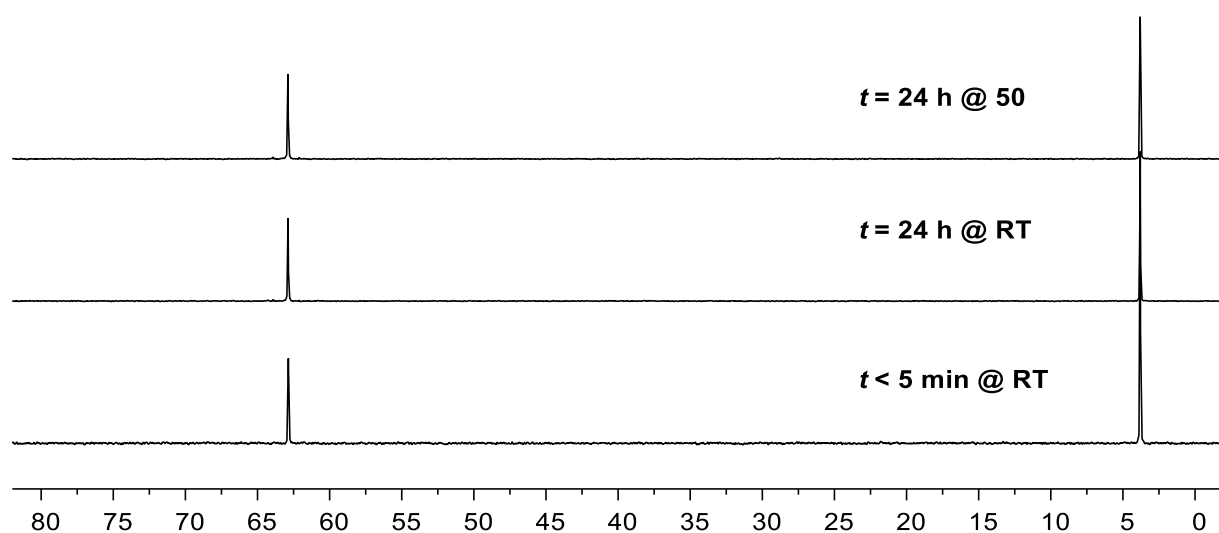

**Figure S13.**  $^{31}\text{P}\{^1\text{H}\}$  NMR spectra collected following addition of PhI to  $\text{PtBu}_3$  (DFB/ $\text{C}_6\text{D}_6$ , 162 MHz;  $\text{O}=\text{P}(\text{OMe})_3$  internal reference at  $\delta$  3.8).

### 3.3. Adamantyl iodide

Following the general procedure using AdI (26.2 mg, 100  $\mu$ mol). No reaction was apparent after 24 h at RT, nor after subsequent heating at 50  $^{\circ}$ C for 24 h.

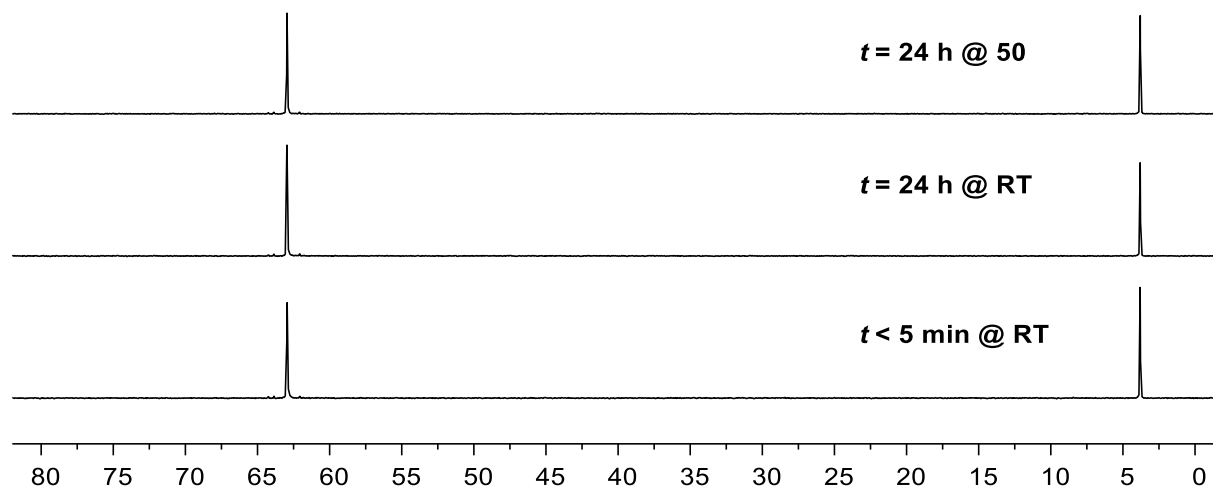

**Figure S14.**  $^{31}\text{P}\{^1\text{H}\}$  NMR spectra collected following addition of AdI to  $\text{PtBu}_3$  (DFB/ $\text{C}_6\text{D}_6$ , 162 MHz;  $\text{O}=\text{P}(\text{OMe})_3$  internal reference at  $\delta$  3.8).

### 3.4. *tert*-Butyl iodide

Following the general procedure using *t*Bul (11.9  $\mu$ L, 100  $\mu$ mol). No reaction was apparent after 24 hours at RT, nor after subsequent heating at 50  $^{\circ}$ C for 24 h.

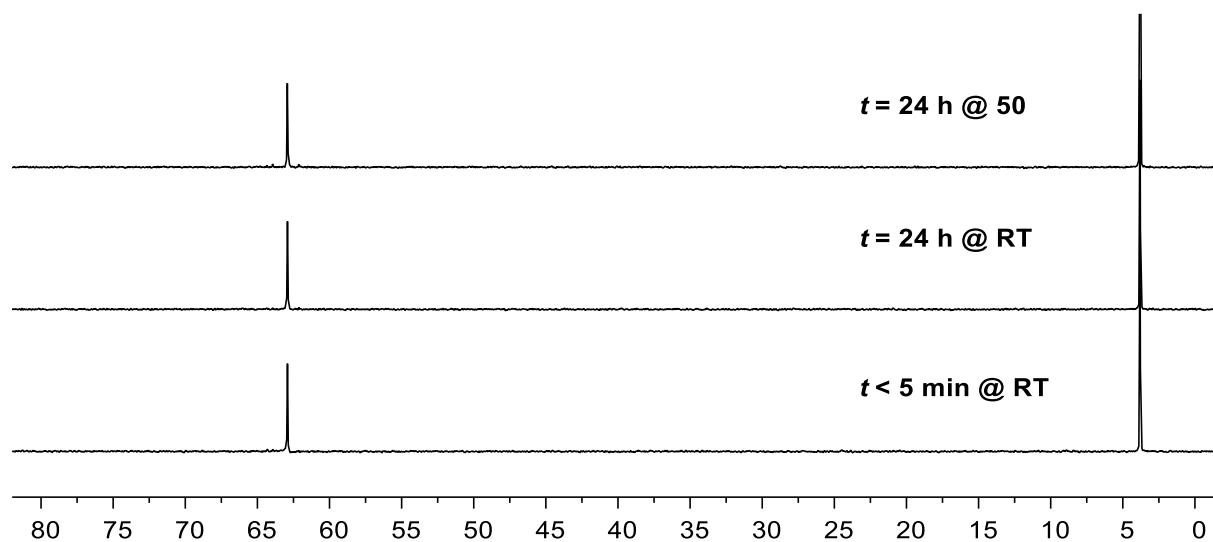

**Figure S15.**  $^{31}\text{P}\{^1\text{H}\}$  NMR spectra collected following addition of *t*Bul to  $\text{PtBu}_3$  (DFB/ $\text{C}_6\text{D}_6$ , 162 MHz;  $\text{O}=\text{P}(\text{OMe})_3$  internal reference at  $\delta$  3.8).

### 3.5. Iodine

To a solution of  $I_2$  (13.0 mg, 51  $\mu$ mol) in DFB (0.5 mL) within a J. Young valve NMR tube was added a solution of  $PtBu_3$  in hexane (15  $\mu$ L, 0.69 M, 10  $\mu$ mol) at RT. Analysis within 5 min using  $^1H$  and  $^{31}P$  NMR spectroscopy indicated complete conversion to  $[PtBu_3]I$ . Spectroscopic data of **3d** is consistent with that reported for the corresponding  $[B(C_6F_5)_3F]^-$  salt.<sup>9</sup>

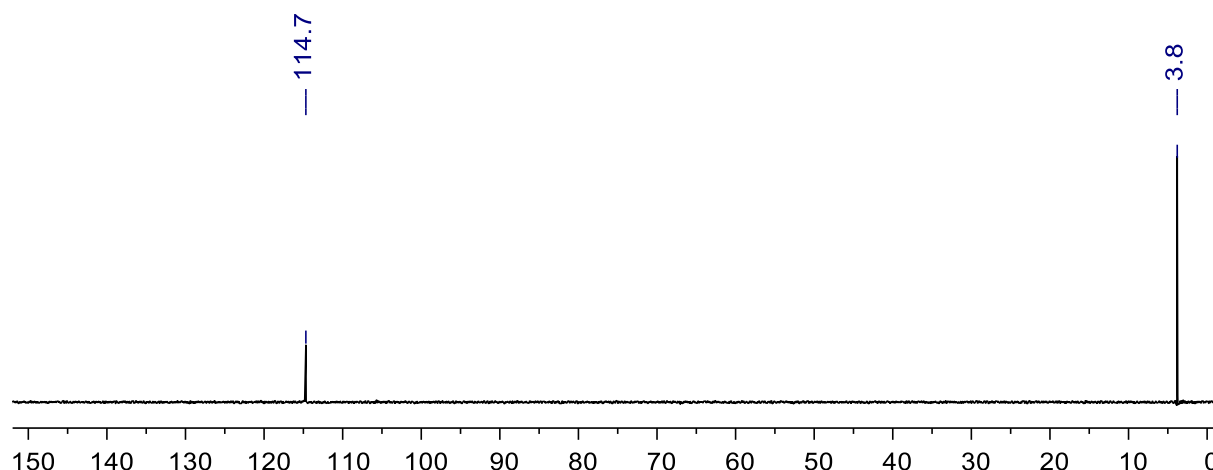

**Figure S16.**  $^{31}P\{^1H\}$  NMR spectra collected following addition of  $I_2$  to  $PtBu_3$  (DFB/ $C_6D_6$ , 162 MHz;  $O=P(OMe)_3$  internal reference at  $\delta$  3.8).

### 3.6. Preparation of $[PtBu_3H][PF_6]$

To a solution of  $PtBu_3$  in pentane (1.25 mL, 0.87 M, 1.1 mmol) was added a solution of HCl in diethyl ether (1.44 mL, 1 M, 1.4 mmol) dropwise at RT. The resulting solution was stirred at RT for 30 min and volatiles removed *in vacuo*. The white residue was extracted with degassed acetone (10 mL) and a solution of  $Na[PF_6]$  (241.0 mg, 1.4 mmol) in degassed acetone (10 mL) was added to the filtrate. The resulting solution was stirred for 30 min and volatiles removed *in vacuo*. The product was thereafter extracted from the residual salts using  $CH_2Cl_2$  (3 $\times$ 5 mL) and dried *in vacuo*. Yield: 280.1 mg (804  $\mu$ mol, 73%). Spectroscopic data are in agreement with the literature and the assignment is supported by determination of the solid-state structure.<sup>6</sup>

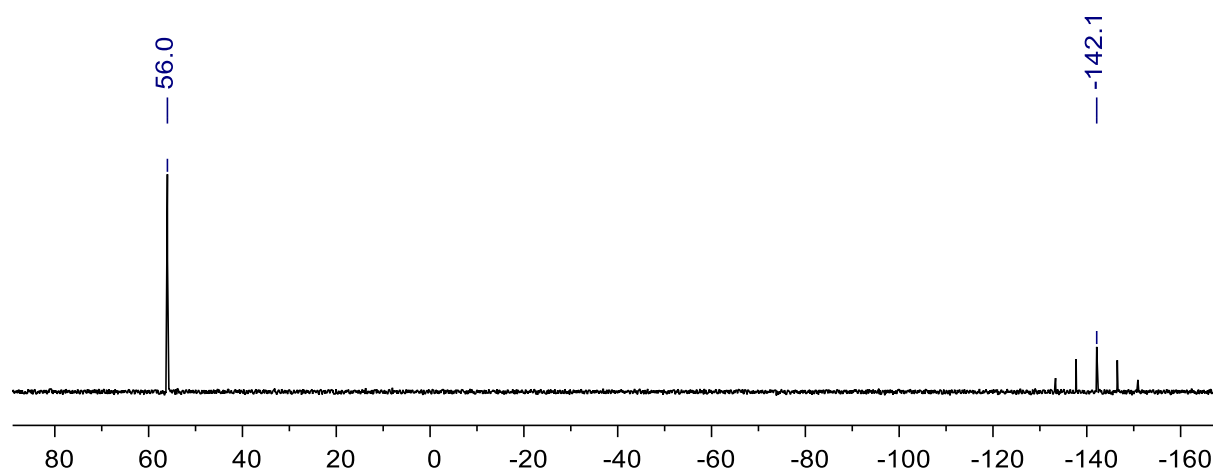

**Figure S17.**  $^{31}\text{P}\{^1\text{H}\}$  NMR spectrum of  $[\text{PtBu}_3\text{H}][\text{PF}_6]$  (DFB/ $\text{C}_6\text{D}_6$ , 162 MHz).

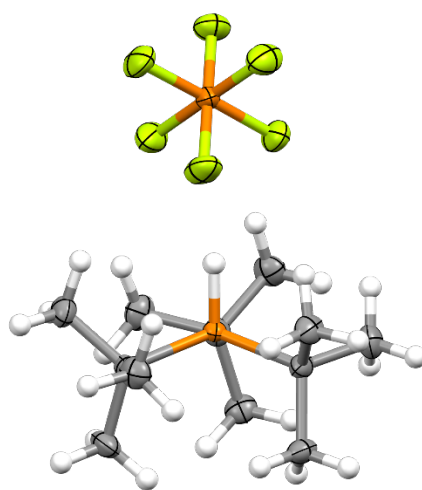

**Figure S18.** Solid-state structure of  $[\text{PtBu}_3\text{H}][\text{PF}_6]$ . Thermal ellipsoids at 50% probability.

## 4. Isolation, characterisation, and stability of [Pd(PtBu<sub>3</sub>)<sub>2</sub>(2-(MeO)C<sub>6</sub>H<sub>4</sub>)] [PF<sub>6</sub>] **4b**

### 4.1. Preparation of **4b**

To a solution of [Pd(PtBu<sub>3</sub>)<sub>2</sub>][PF<sub>6</sub>] **1** (75.1 mg, 114 μmol) in DFB (5 mL) was added 2-methoxyphenyl iodide (14.9 μL, 115 μmol) and the resulting solution stirred for 18 h at RT. The solvent was removed *in vacuo* and the residue purified by column chromatography (silica, CH<sub>2</sub>Cl<sub>2</sub>) to afford the product, which was subsequently recrystallised from DFB/hexane at −40 °C and obtained as red blocks. Yield: 28.0 mg (36.7 μmol, 32%).

**<sup>1</sup>H NMR** (500 MHz, DFB/C<sub>6</sub>D<sub>6</sub>, selected data): δ 6.64 (t, <sup>3</sup>J<sub>HH</sub> = 7.9, 5-Ar), 6.17 (d, <sup>3</sup>J<sub>HH</sub> = 6.2, 3-Ar), 3.63 (s, 3H, OMe), 1.19 (vt, J<sub>PH</sub> = 12.7, 54H, tBu).

**<sup>13</sup>C{<sup>1</sup>H} NMR** (126 MHz, DFB/C<sub>6</sub>D<sub>6</sub>): δ 159.0 (vt, J<sub>PC</sub> = 11, 1-Ar), 157.5 (s, 2-Ar), 135.9 (s, 6-Ar), 127.0 (s, 4-Ar), 120.6 (s, 5-Ar), 110.5 (s, 3-Ar), 53.6 (s, OMe), 40.2 (vt, J<sub>PC</sub> = 7, tBu{C}), 31.9 (vt, J<sub>PC</sub> = 4, tBu{CH<sub>3</sub>}).

**<sup>31</sup>P{<sup>1</sup>H} NMR** (162 MHz, DFB/C<sub>6</sub>D<sub>6</sub>): δ 62.0 (s, 2P, PtBu<sub>3</sub>), -142.3 (sept, <sup>1</sup>J<sub>PF</sub> = 710, 1P, PF<sub>6</sub>).

**HR ESI-MS** (positive ion, 4 kV): 617.3233 ([M]<sup>+</sup>, calcd 617.3239) *m/z*.

**UV/Vis** (DFB): λ<sub>max</sub>/nm = 310 (ε = 8300 L<sup>−1</sup> mol<sup>−1</sup> cm<sup>−1</sup>), 435 (ε = 1900 L<sup>−1</sup> mol<sup>−1</sup> cm<sup>−1</sup>).

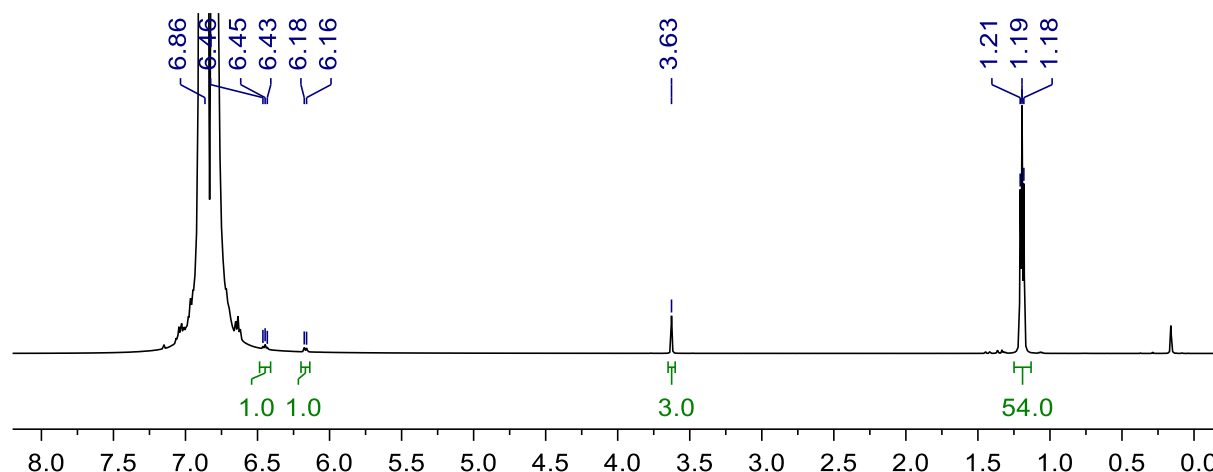

Figure S19. <sup>1</sup>H NMR spectrum of **4b** (DFB/C<sub>6</sub>D<sub>6</sub>, 500 MHz).

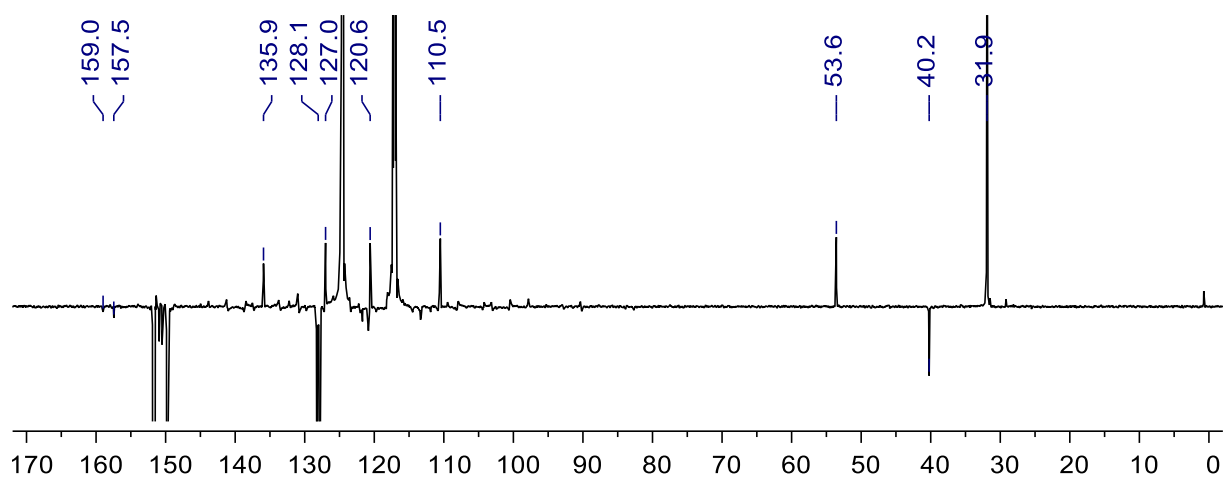

**Figure S20.**  $^{13}\text{C}\{^1\text{H}\}$  APT NMR spectrum of **4b** (DFB/ $\text{C}_6\text{D}_6$ , 126 MHz).

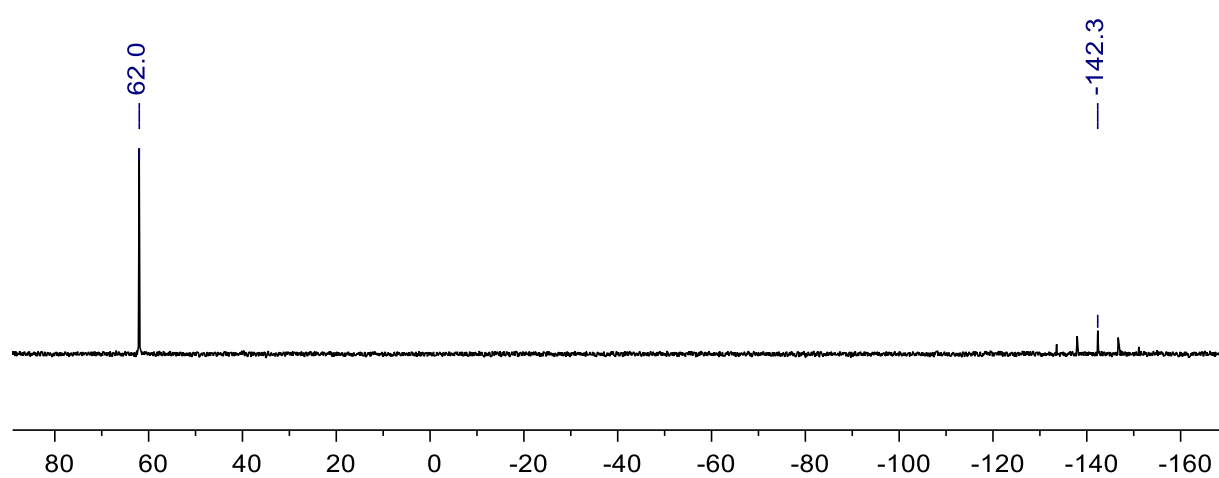

**Figure S21.**  $^{31}\text{P}\{^1\text{H}\}$  NMR spectrum of **4b** (DFB/ $\text{C}_6\text{D}_6$ , 162 MHz).

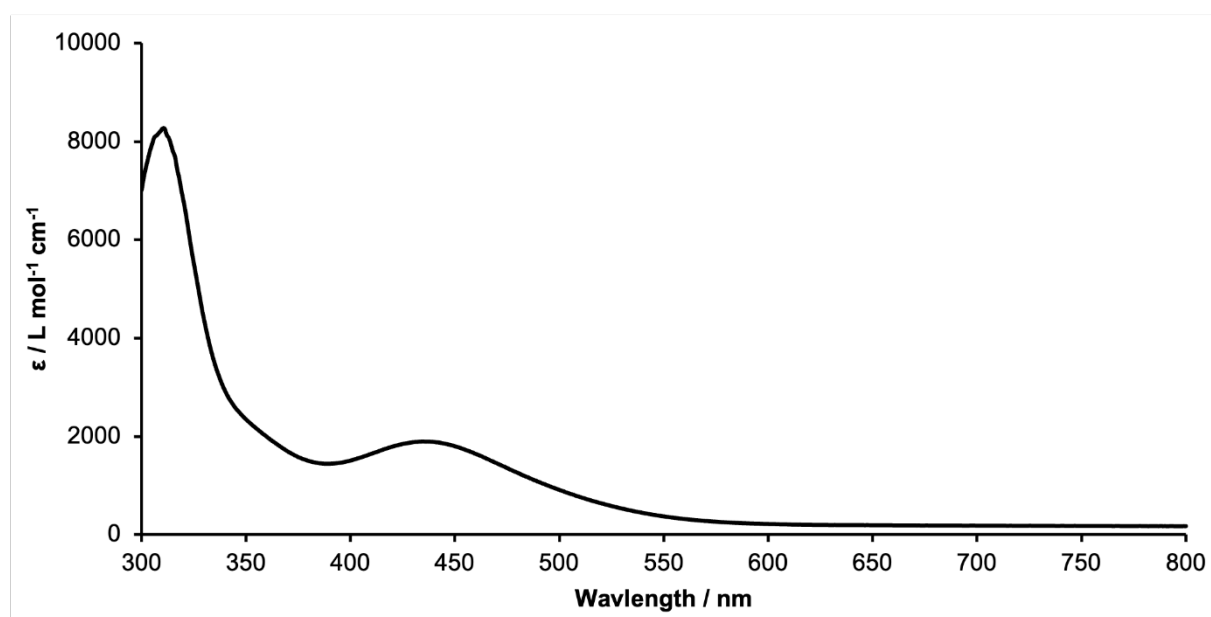

**Figure S22.** UV/vis spectrum of **4b** (DFB).

## 4.2. Stability of **4b**

A solution of **4b** (7.4 mg, 9.7  $\mu\text{mol}$ ) in DFB (0.5 mL) within a J. Young valve NMR tube was monitored over 14 days at RT using  $^1\text{H}$  and  $^{31}\text{P}$  NMR spectroscopy, with constant mixing when not in the spectrometer. Onward reactivity of **4b** was observed with an approximate  $t_{1/2}$  of 3 days, concomitant with formation of  $[\text{PtBu}_3(2-(\text{MeO})\text{C}_6\text{H}_4)]^+$  **3b**,  $[\text{PtBu}_3\text{H}]^+$ , and precipitation of palladium black.

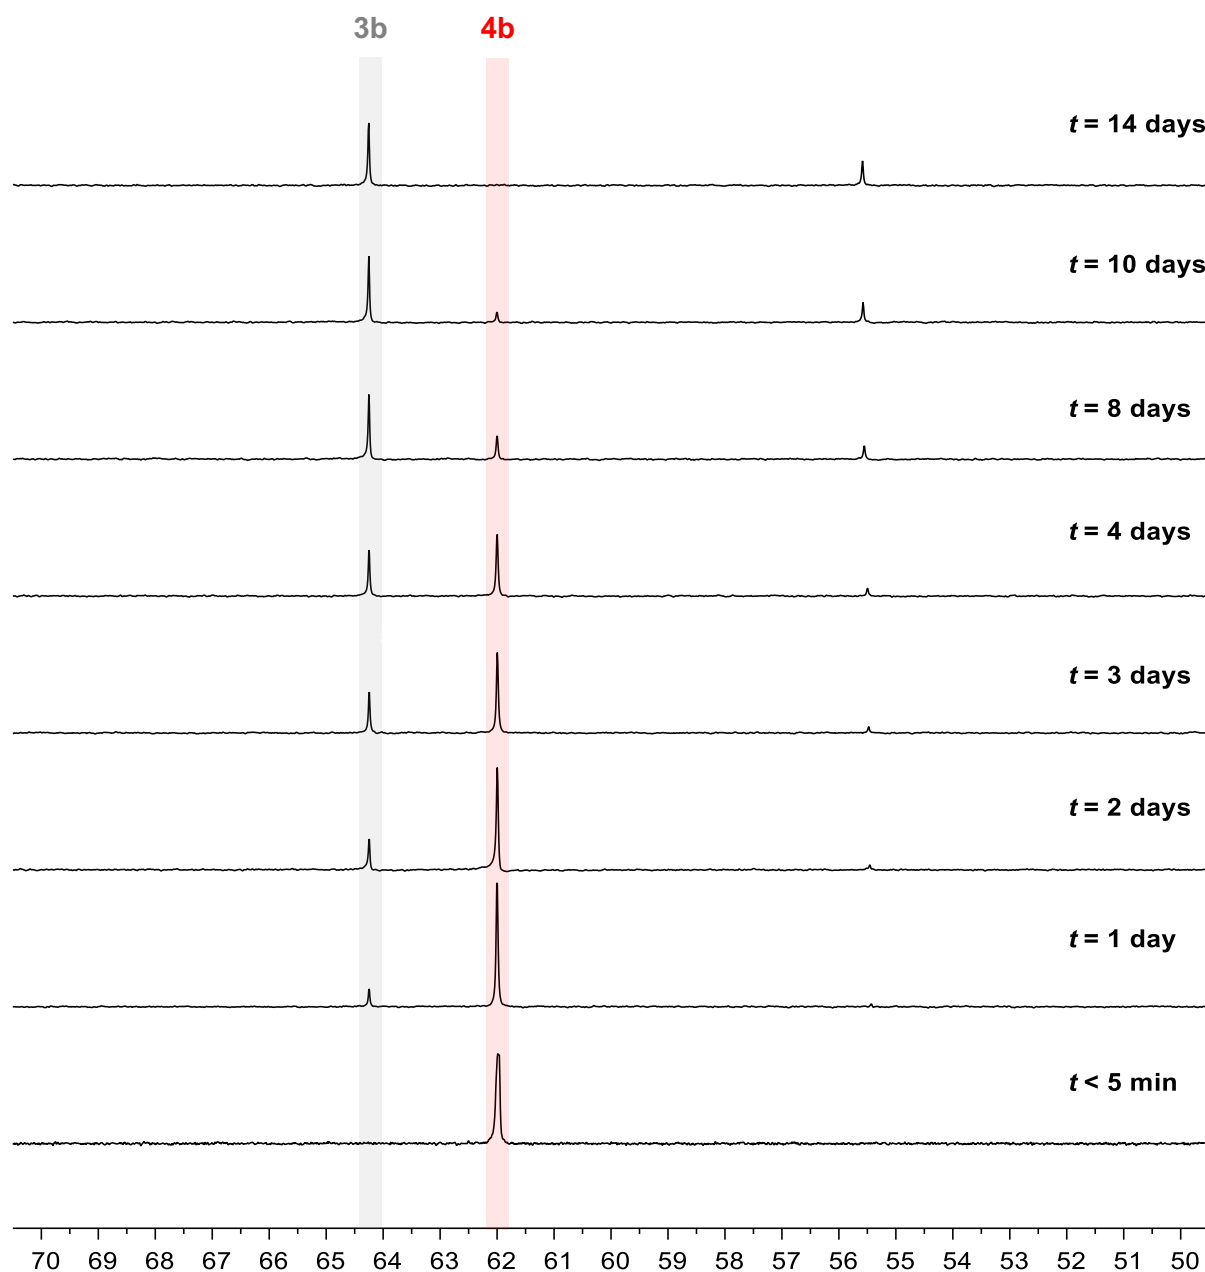

**Figure S23.**  $^{31}\text{P}\{^1\text{H}\}$  NMR spectra collected following thermolysis of **4b** at RT (DFB/ $\text{C}_6\text{D}_6$ , 162 MHz).

### 4.3. Stability of **4b** in the presence of excess $\text{PtBu}_3$

A solution of **4b** (7.6 mg, 10  $\mu\text{mol}$ ) and  $\text{PtBu}_3$  (64  $\mu\text{L}$  of a 0.72 M solution in hexane, 46  $\mu\text{mol}$ ) in DFB (0.5 mL) within a J. Young valve NMR tube was monitored over 15 days at RT using  $^1\text{H}$  and  $^{31}\text{P}$  NMR spectroscopy, with constant mixing when not in the spectrometer. Onward reactivity of **4b** was observed with an approximate  $t_{1/2}$  of 3 days, concomitant with formation of  $[\text{Pd}(\text{PtBu}_3)_2]$  and  $[\text{PtBu}_3(2\text{-(MeO)C}_6\text{H}_4)]^+$  **3b**.

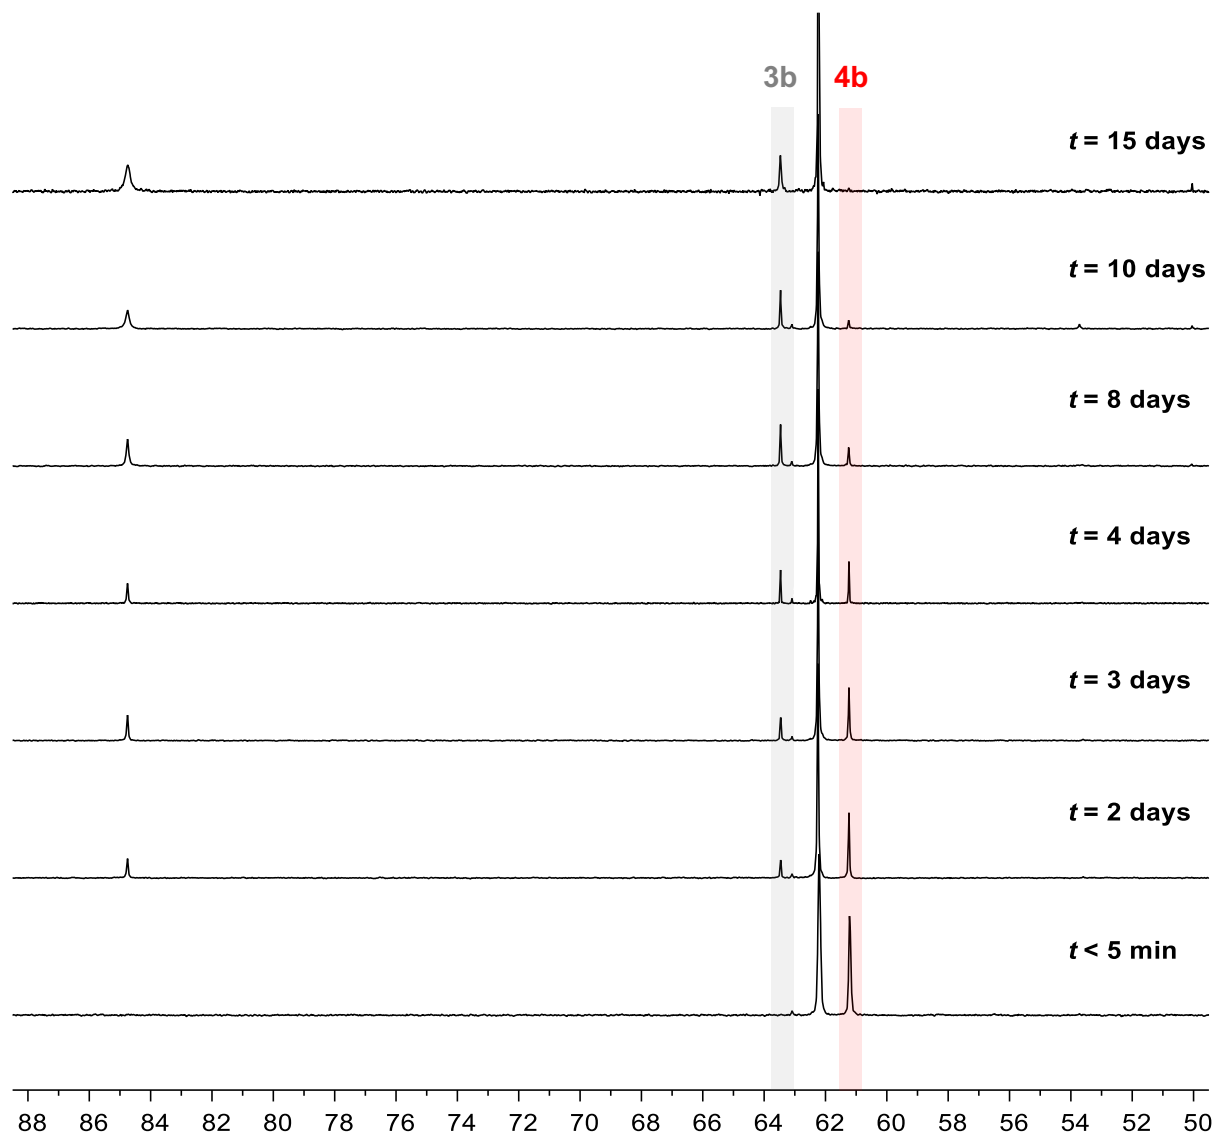

**Figure S24.**  $^{31}\text{P}\{^1\text{H}\}$  NMR spectra collected following thermolysis of **4b** at RT in the presence of excess  $\text{PtBu}_3$  (DFB/ $\text{C}_6\text{D}_6$ , 162 MHz).

## 5. Isolation, characterisation, and stability of $[\text{Pd}(\text{P}t\text{Bu}_3)_2(2,6\text{-(MeO)}_2\text{C}_6\text{H}_3)][\text{PF}_6]$ **4c**

### 5.1. Preparation of **4c**

A solution of  $[\text{Pd}(\text{P}t\text{Bu}_3)_2][\text{PF}_6]$  (100 mg, 152  $\mu\text{mol}$ ) and 2,6-bis(methoxy)phenyl iodide (40.3 mg, 153  $\mu\text{mol}$ ) in DFB (5 mL) was stirred at RT for 1 day. The solvent was removed *in vacuo* and the residue purified by column chromatography (silica,  $\text{CH}_2\text{Cl}_2$ ) to afford the product, which was subsequently recrystallised from DFB/hexane at  $-40^\circ\text{C}$  and obtained as red blocks. Yield: 45.4 mg (57.2  $\mu\text{mol}$ , 38%).

$^1\text{H}$  NMR (500 MHz, DFB/ $\text{C}_6\text{D}_6$ , selected data):  $\delta$  5.93 (d,  $^3J_{\text{HH}} = 6.4$ , 2H, Ar), 3.61 (s, 6H, OMe), 1.20 (vt,  $J_{\text{PH}} = 12.8$ , 54H,  $\text{P}t\text{Bu}_3$ ).

$^{13}\text{C}\{^1\text{H}\}$  NMR (126 MHz, DFB/ $\text{C}_6\text{D}_6$ ):  $\delta$  158.8 (vt,  $J_{\text{PC}} = 3$ , 2-Ar), 128.0 (s, 4-Ar), 107.3 (s, 1-Ar), 103.7 (s, 3-Ar), 53.6 (s, OMe), 39.9 (vt,  $J_{\text{PC}} = 7$ ,  $t\text{Bu}\{\text{C}\}$ ), 31.9 (vt,  $J_{\text{PC}} = 5$ ,  $t\text{Bu}\{\text{CH}_3\}$ ).

$^{31}\text{P}\{^1\text{H}\}$  NMR (162 MHz, DFB/ $\text{C}_6\text{D}_6$ ):  $\delta$  65.3 (s, 2P,  $\text{P}t\text{Bu}_3$ ), -142.4 (sept,  $^1J_{\text{PF}} = 710$ , 1P,  $\text{PF}_6$ ).

HR ESI-MS (positive ion, 4 kV): 647.3441 ( $[\text{M}]^+$ , calcd 647.3345)  $m/z$ .

UV/Vis (DFB):  $\lambda_{\text{max}}/\text{nm} = 321$  ( $\epsilon = 9900 \text{ L}^{-1} \text{ mol}^{-1} \text{ cm}^{-1}$ ), 463 ( $\epsilon = 1700 \text{ L}^{-1} \text{ mol}^{-1} \text{ cm}^{-1}$ ).

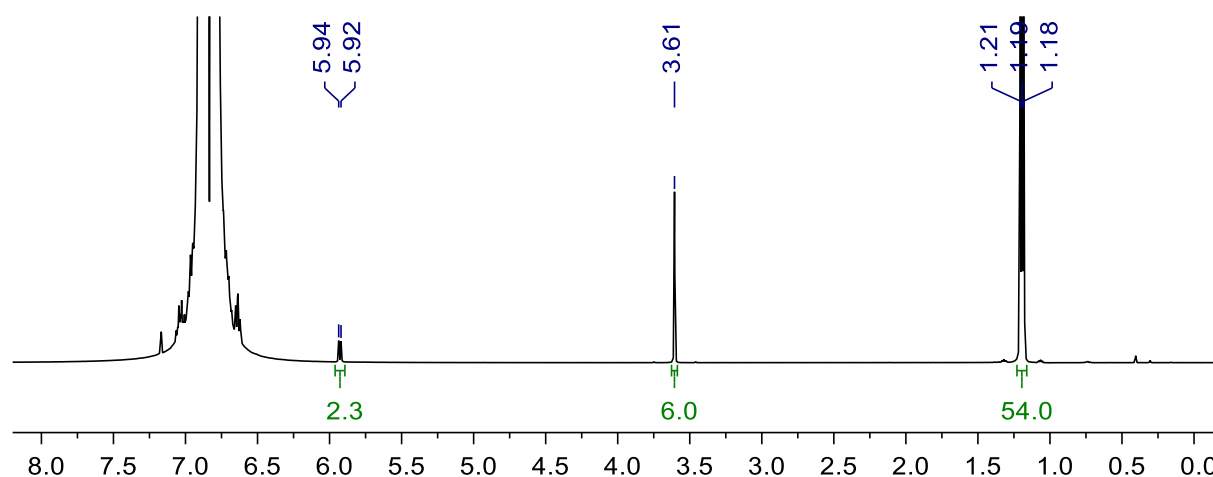

Figure S25.  $^1\text{H}$  NMR spectrum of **4c** (DFB/ $\text{C}_6\text{D}_6$ , 500 MHz).

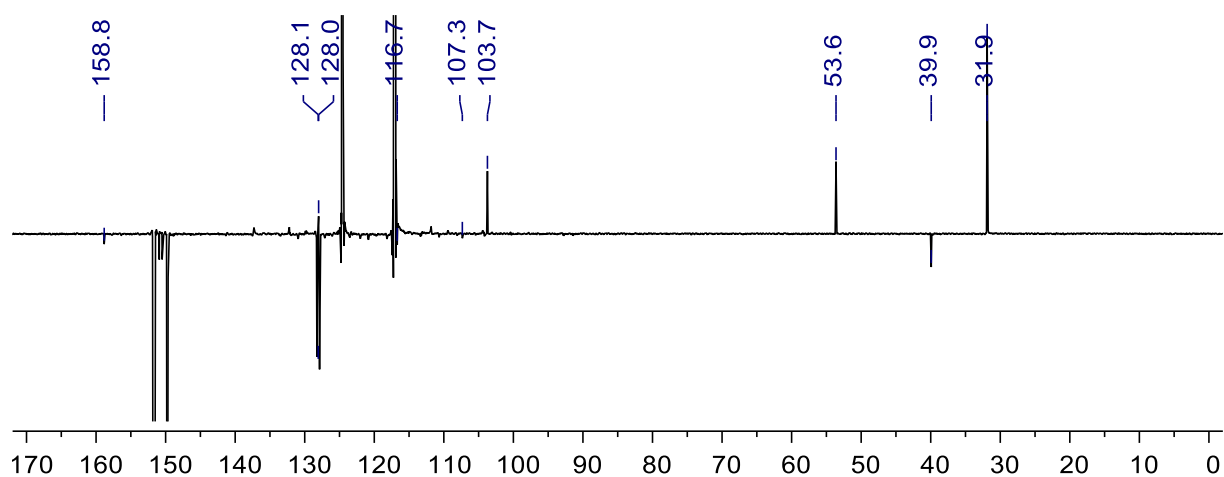

**Figure S26.**  $^{13}\text{C}\{^1\text{H}\}$  APT NMR spectrum of **4c** (DFB/ $\text{C}_6\text{D}_6$ , 126 MHz).

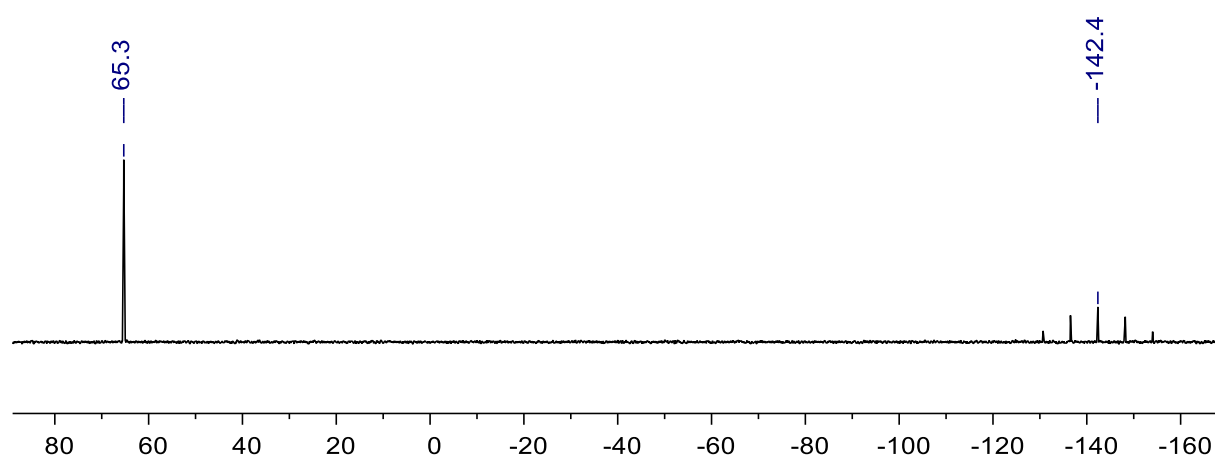

**Figure S27.**  $^{31}\text{P}\{^1\text{H}\}$  NMR spectrum of **4c** (DFB/ $\text{C}_6\text{D}_6$ , 162 MHz).

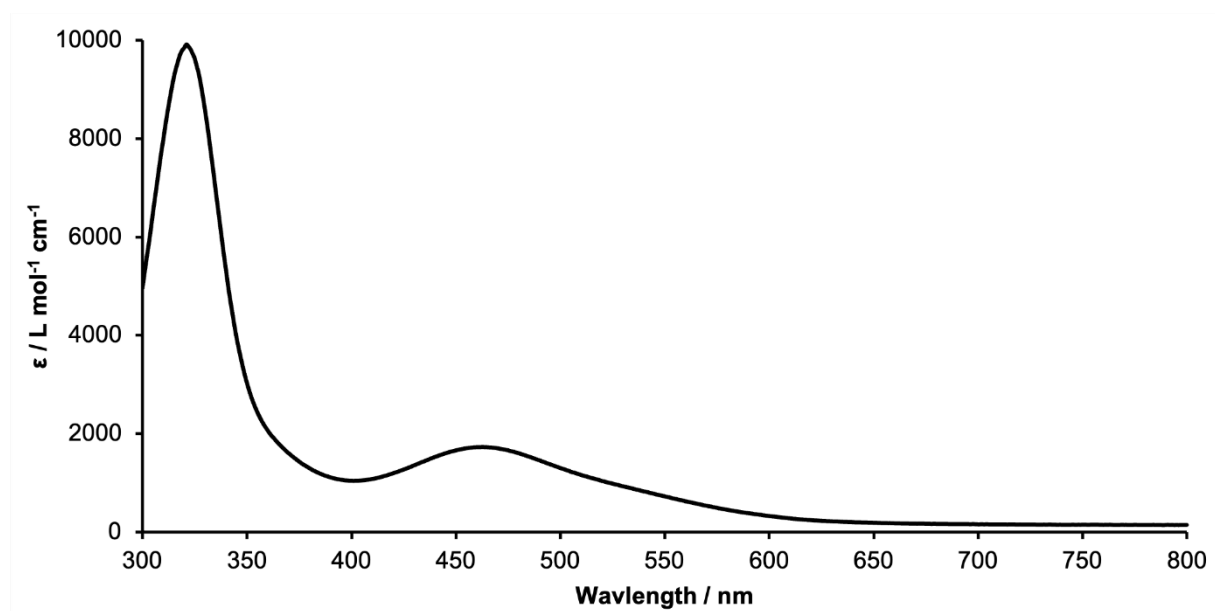

**Figure S28.** UV/vis spectrum of **4c** (DFB).

## 5.2. Stability of 4c

A solution of **4c** (7.8 mg, 9.8  $\mu\text{mol}$ ) in DFB (0.5 mL) within a J. Young valve NMR tube was monitored over 14 days at RT using  $^1\text{H}$  and  $^{31}\text{P}$  NMR spectroscopy, with constant mixing when not in the spectrometer. No onward reactivity was apparent.

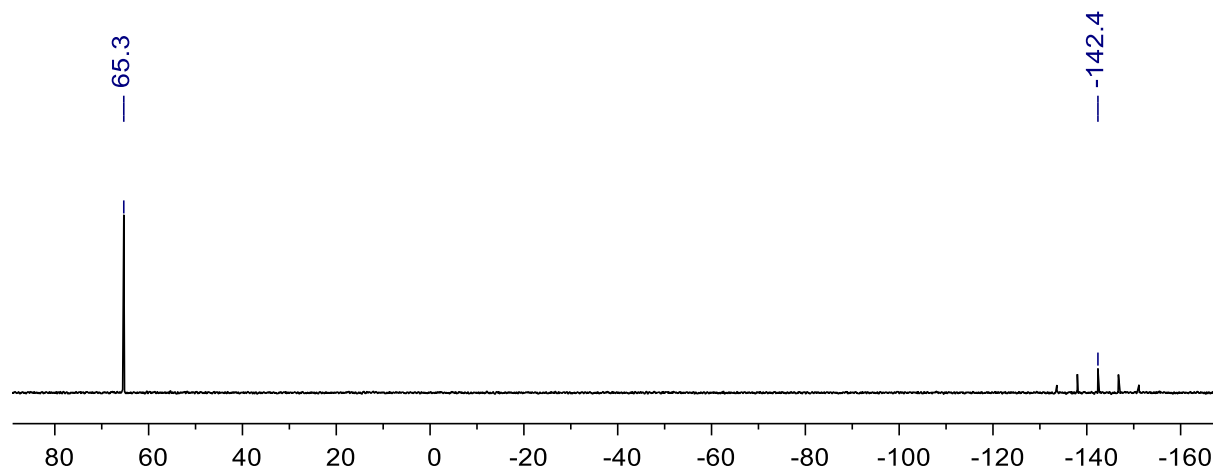

**Figure S29.**  $^{31}\text{P}\{^1\text{H}\}$  NMR spectrum collected after thermolysis of **4b** at RT for 14 days (DFB/ $\text{C}_6\text{D}_6$ , 162 MHz).

## 6. Mechanistic sketch

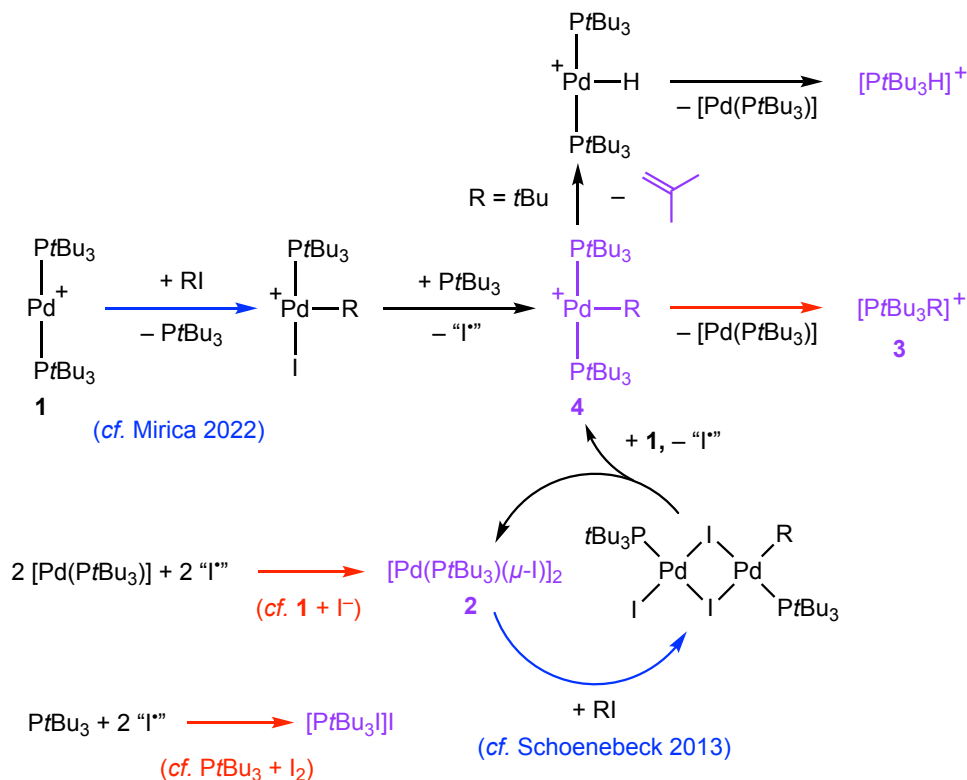

**Figure S30.** Overview of proposed mechanism: observed products in purple, reactions with experimental evidence in red, reactions with literature precedents in blue.

## 7. References

---

- <sup>1</sup> S. D. Pike, M. R. Crimmin and A. B. Chaplin, *Chem. Commun.* 2017, **53**, 3615–3636.
- <sup>2</sup> T. Troadec, S.-y. Tan, C. J. Wedge, J. P. Rourke, P. R. Unwin and A. B. Chaplin, *Angew. Chem. Int. Ed.* 2016, **55**, 3754–3757.
- <sup>3</sup> M. Auferio, T. Sperger, A. S. K. Tsang and F. Schoenebeck, *Angew. Chem. Int. Ed.*, 2015, **54**, 10322–10326.
- <sup>4</sup> P. S. Pregosin, *NMR in Organometallic Chemistry*, Wiley-VCH, 2012, pp 251–254.
- <sup>5</sup> E. Rémond, A. Tessier, F. R. Leroux, J. Bayardon and Sylvain Jugé, *Org. Lett.* 2010, **12**, 1568–1571.
- <sup>6</sup> Q. Simpson, M. J. G. Sinclair, D. W. Lupton, A. B. Chaplin and J. F. Hooper. *Org. Lett.* 2018, **20**, 5537–5540.
- <sup>7</sup> C. B. Caputo and D. W. Stephan, *Organometallics*, 2012, **31**, 27–30.
- <sup>8</sup> A. Y. Jordan and T. Y. Meyer, *J. Organomet. Chem.*, 1999, **591**, 104–113
- <sup>9</sup> I. Behrends, S. Bähr and C. Czekelius, *Chem.–Eur. J.*, 2016, **22**, 17177–17181
